# Supplementary material
Source: Springer Nature journal article supplement (https://www.springermedizin.de/resource/supplementary/13075_2011_3437_MOESM1_ESM.pdf/9694136)

**A**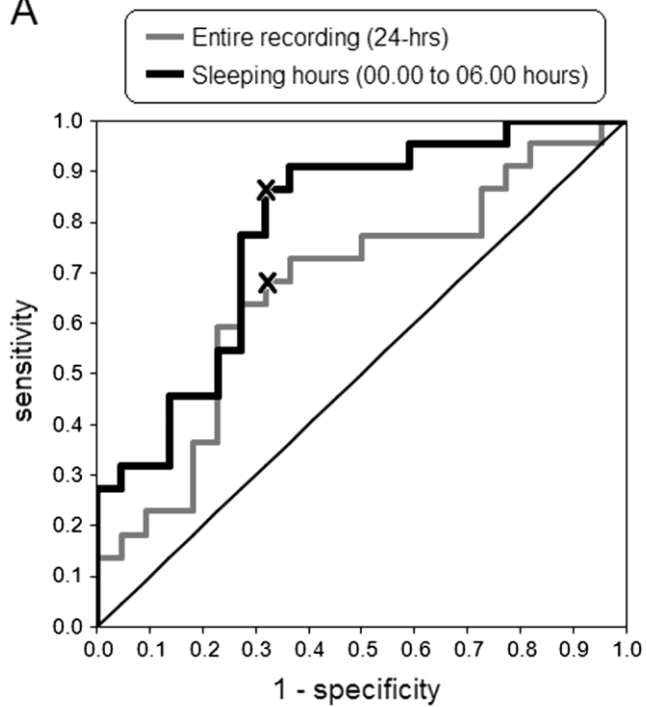**B**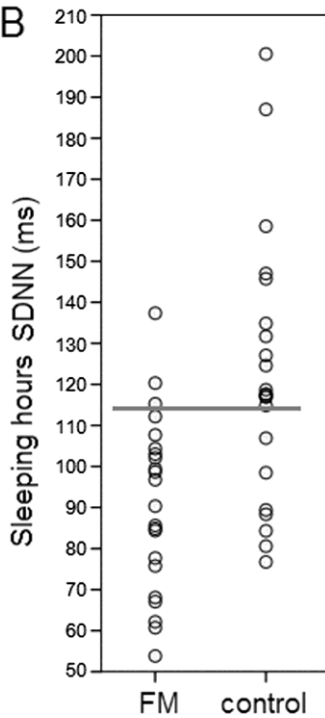

Supplement: MOESM1 [file 9694136]
